# Supplementary material for: High-performance flexible photodetectors based on CdTe/MoS2 heterojunction
Source: Royal Society of Chemistry journal article supplement (doi:10.1039/d4nr01718h), 2024-01-01
Supplement: d4nr01718h1.pdf [file d4nr01718h1.pdf]

**[Supplementary Information]**

**High-performance flexible photodetectors based on CdTe/MoS<sub>2</sub>  
heterojunction**

Shuo Yang,<sup>a</sup> Yunjie Liu,<sup>b</sup> Yupeng Wu,<sup>a</sup> Fuhai Guo,<sup>a</sup> Mingcong Zhang,<sup>a</sup> Xinru Zhu,<sup>a</sup>  
Ruqing Xu<sup>a</sup> and Lanzhong Hao<sup>\*a</sup>

a. School of Materials Science and Engineering, China University of Petroleum, Qingdao, Shandong,  
266580, P. R. China. E-mail: haolanzhong@upc.edu.cn

b. College of Science, China University of Petroleum, Qingdao, Shandong, 266580, P. R. China

\*corresponding author: haolanzhong@upc.edu.cn

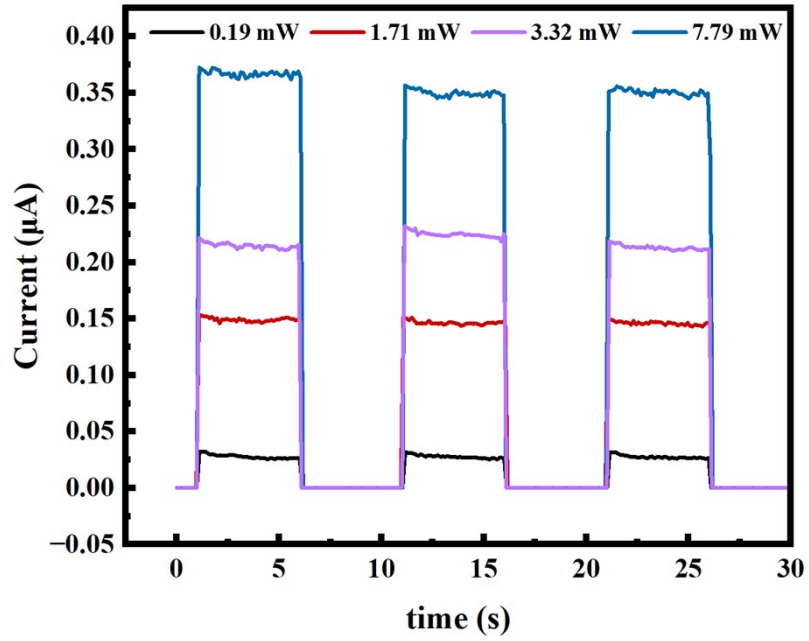

Fig. S1 Time-dependent photoresponse curves CdTe/MoS<sub>2</sub> under 520 nm light illuminations.

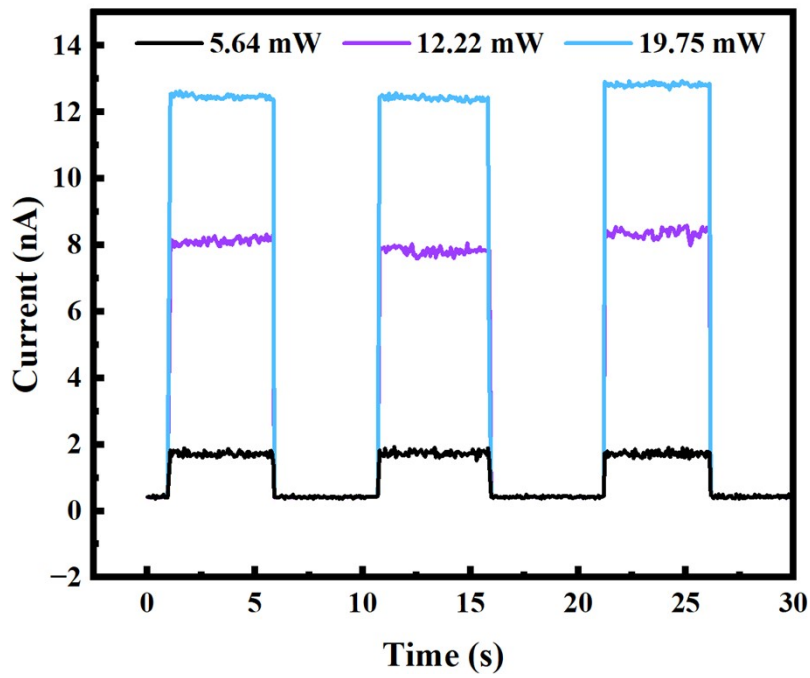

Fig. S2 Time-dependent photoresponse curves CdTe/MoS<sub>2</sub> under 980 nm light illuminations.

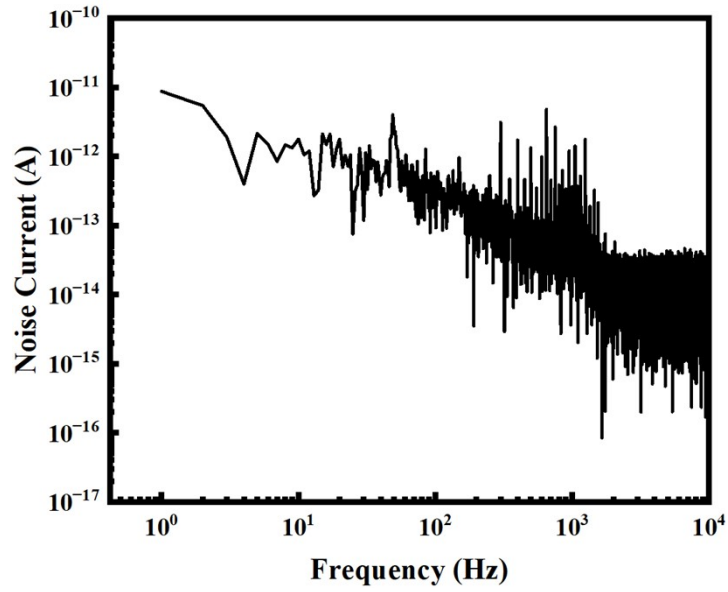

Fig. S3 Noise spectrum of the CdTe/MoS<sub>2</sub> heterojunction

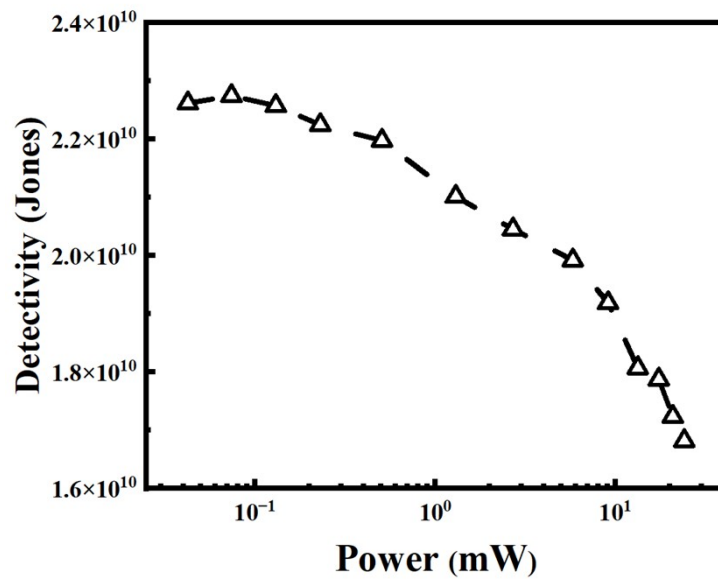

Fig. S4 Detectability of CdTe/MoS<sub>2</sub> heterojunction calculated using NEP

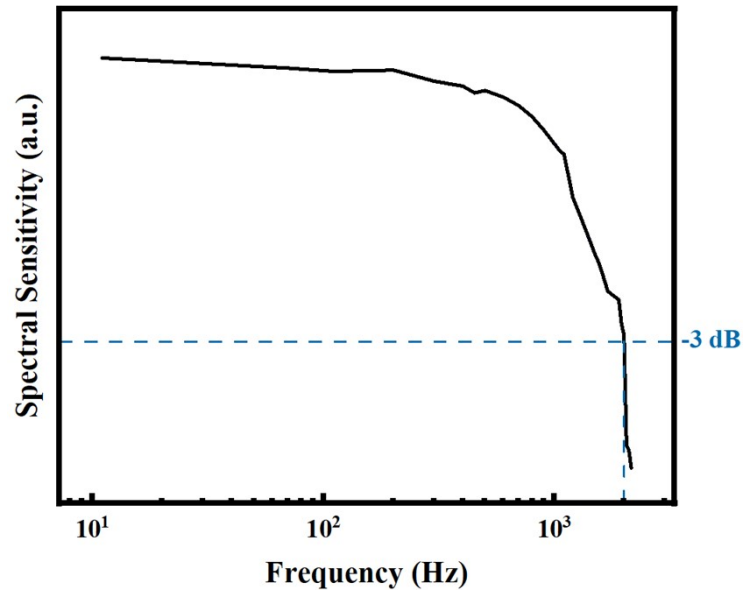

Fig. S5 Photocurrent versus frequency curve of CdTe/MoS<sub>2</sub> heterojunction.
